# Supplementary material for: The Impact of Inadequate Exposure to Epidermal Growth Factor Receptor–Tyrosine Kinase Inhibitors on the Development of Resistance in Non-Small-Cell Lung Cancer Cells
Source: MDPI journal article supplement (doi:10.3390/ijms25094844), 2024-04-29
Supplement: s1 [file s1]

# **The Impact of Inadequate Exposure to Epidermal Growth Factor Receptor–Tyrosine Kinase Inhibitors on the Development of Resistance in Non-Small-Cell Lung Cancer Cells**

**Daniela Frezzetti <sup>1</sup>, Vincenza Caridi <sup>1</sup>, Laura Marra <sup>1</sup>, Rosa Camerlingo <sup>1</sup>, Amelia D'Alessio <sup>2</sup>, Francesco Russo <sup>3</sup>, Serena Dotolo <sup>1</sup>, Anna Maria Rachiglio <sup>1</sup>, Rizio Esposito Abate <sup>1</sup>, Marianna Gallo <sup>1</sup>, Monica Rosaria Maiello <sup>1</sup>, Alessandro Morabito <sup>4</sup>, Nicola Normanno <sup>1,\*</sup> and Antonella De Luca <sup>1</sup>**

## **Table of contents**

|                                   |                  |
|-----------------------------------|------------------|
| <b>Supplementary Methods.....</b> | <b>Page 2</b>    |
| <b>Supplementary Tables.....</b>  | <b>Pages 3</b>   |
| <b>Supplementary Figures.....</b> | <b>Pages 4-9</b> |

## Supplementary Methods

### *Cell proliferation assay*

HCC827 and PC9 parental and gefitinib resistant (GR) cells ( $2 \times 10^3$  cells/well and  $6 \times 10^2$  cells/well, respectively) were seeded in 96-well plates in gefitinib-free medium. Cell proliferation was determined by tetrazolium-based (MTT) colorimetric assay according to standard procedures.

## Supplementary Tables

**Table S1:** List of genes analysed by targeted sequencing

| Hot spot genes               | Full-length genes        | Copy number genes     | Gene fusions          |
|------------------------------|--------------------------|-----------------------|-----------------------|
| AKT1 AKT2 AKT3 ALK AR ARAF   | ARID1A ATM ATR ATRX BAP1 | AKT1 AKT2 AKT3 ALK    | AKT2 ALK AR AXL       |
| AXL BRAF BTK CBL CCND1       | BRCA1 BRCA2 CDK12        | AXL AR BRAF CCND1     | BRCA1 BRCA2 BRAF      |
| CDK4 CDK6 CHEK2 CSF1R        | CDKN1B CDKN2A CDKN2B     | CCND2 CCND3 CCNE1     | CDKN2A EGFR ERBB2     |
| CTNNB1 DDR2 EGFR ERBB2       | CHEK1 CREBBP FANCA       | CDK2 CDK4 CDK6 EGFR   | ERBB4 ERG ESR1 ETV1   |
| ERBB3 ERBB4 ERCC2 ESR1 EZH2  | FANCD2 FANCI FBXW7 MLH1  | ERBB2 ESR1 FGF19 FGF3 | ETV4 ETV5 FGFR1 FGFR2 |
| FGFR1 FGFR2 FGFR3 FGFR4 FLT3 | MRE11 MSH6 MSH2 NBN NF1  | FGFR1 FGFR2 FGFR3     | FGFR3 FGR FLT3 JAK2   |
| FOXL2 GATA2 GNA11 GNAQ       | NF2 NOTCH1 NOTCH2        | FGFR4 FLT3 IGF1R KIT  | KRAS MDM4 MET MYB     |
| GNAS H3F3A HIST1H3B HNF1A    | NOTCH3 PALB2 PIK3R1 PMS2 | KRAS MDM2 MDM4 MET    | MYBL1 NF1 NOTCH1      |
| HRAS IDH1 IDH2 JAK1 JAK2     | POLE PTCH1 PTEN RAD50    | MYC MYCL MYCN NTRK1   | NOTCH4 NRG1 NTRK1     |
| JAK3 KDR KIT KNSTRN KRAS     | RAD51 RAD51B RAD51C      | NTRK2 NTRK3 PDGFRA    | NTRK2 NTRK3 NUTM1     |
| MAGOH MAP2K1 MAP2K2          | RAD51D RNF43 RB1 SETD2   | PDGFRB PIK3CB PIK3CA  | PDGFRA PDGFRB         |
| MAP2K4 MAPK1 MAX MDM4        | SLX4 SMARCA4 SMARCB1     | PPARG RICTOR TERT     | PIK3CA PRKACA         |
| MED12 MET MTOR MYC MYCN      | STK11 TP53 TSC1 TSC2     |                       | PRKACB PTEN PPARG     |
| MYD88 NFE2L2 NRAS NTRK1      |                          |                       | RAD51B RAF1 RB1 RELA  |
| NTRK2 NTRK3 PDGFRA           |                          |                       | RET ROS1 RSPO2 RSPO3  |
| PDGFRB PIK3CB PIK3CA         |                          |                       | TERT                  |
| PPP2R1A PTPN11 RAC1 RAF1     |                          |                       |                       |
| RET RHEB RHOA ROS1 SF3B1     |                          |                       |                       |
| SMAD4 SMO SPOP SRC STAT3     |                          |                       |                       |
| TERT TOP1 U2AF1 XPO1         |                          |                       |                       |

**Table S2:** List of all differentially expressed genes (DEGs) identified in GR cell lines. The content of the table is available as a separate file.

## Supplementary Figures

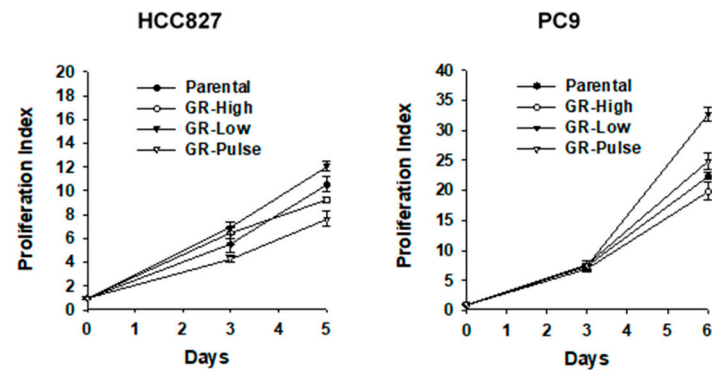

**Figure S1:** Cell proliferation of gefitinib resistant (GR) NSCLC cells. Parental and GR cells were grown in gefitinib-free medium. Cell proliferation was measured at the indicated time points by MTT assay.

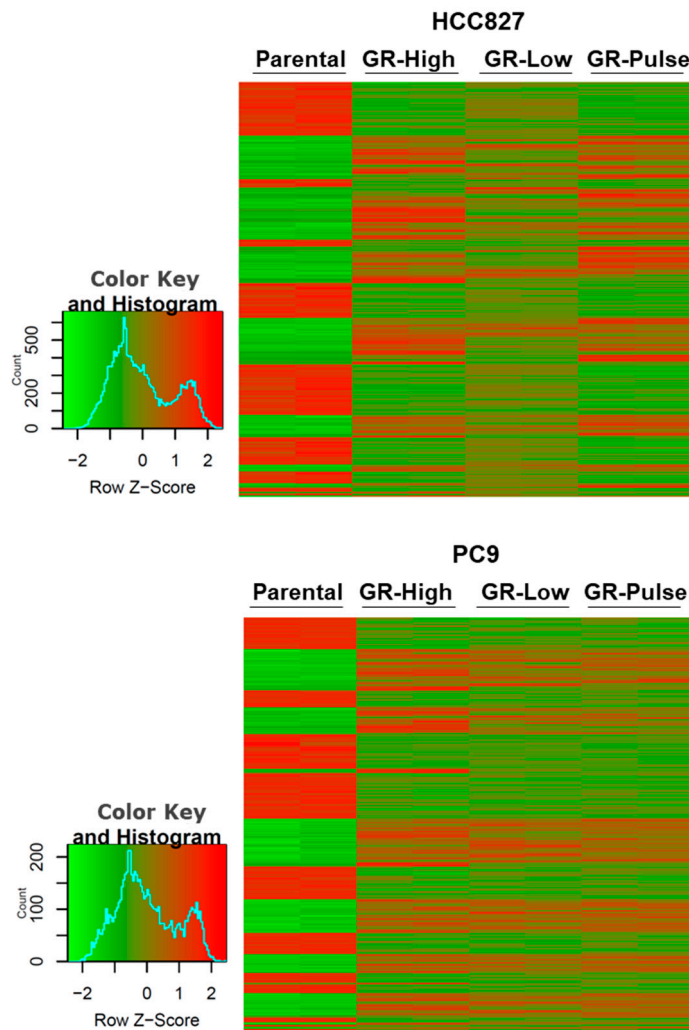

**Figure S2:** Transcriptome analysis of GR cells. RNA-Seq heatmaps showing genes differentially expressed between GR and relative parental cells. Expression data are shown in duplicate for each cell line.

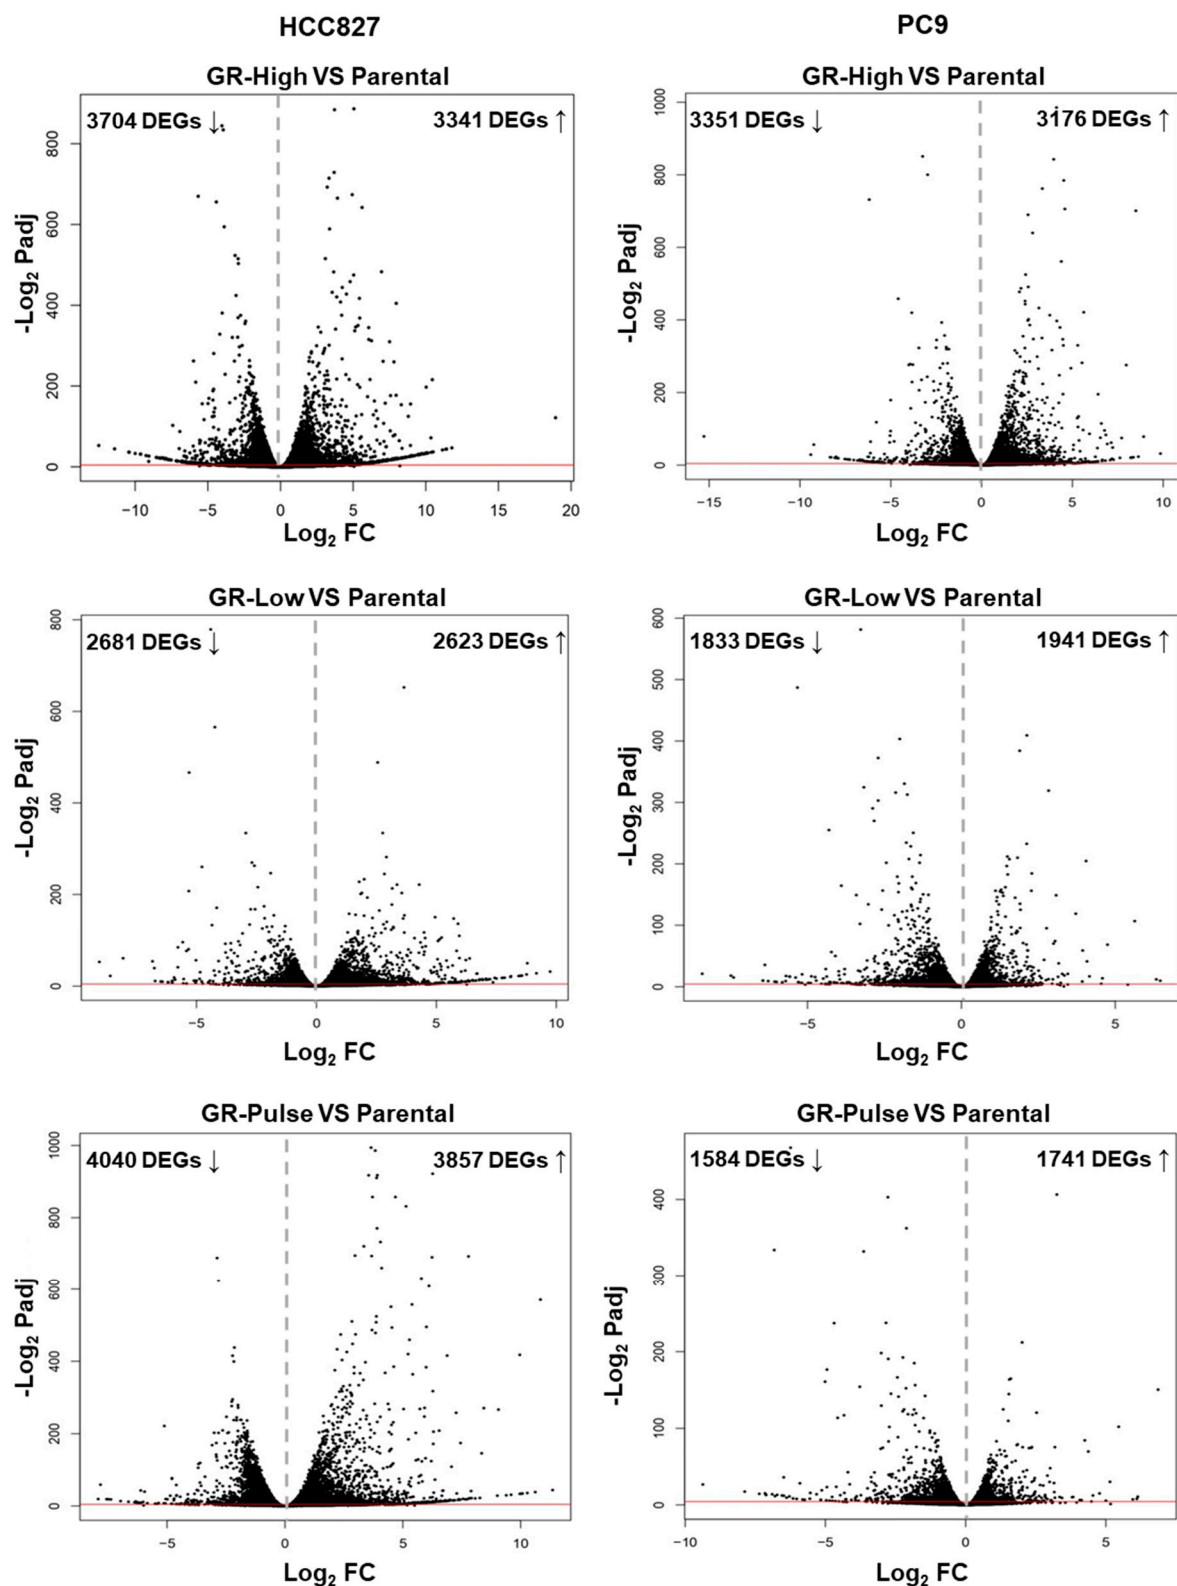

**Figure S3:** Analysis of differentially expressed genes (DEGs) in GR cells. Volcano plots showing DEGs in GR cells relative to parental cells. The number of statistically significant downregulated and upregulated DEGs is indicated in bold (adjusted p-value < 0.05). Abbreviations: Padj: adjusted p-value; FC: Fold Change.

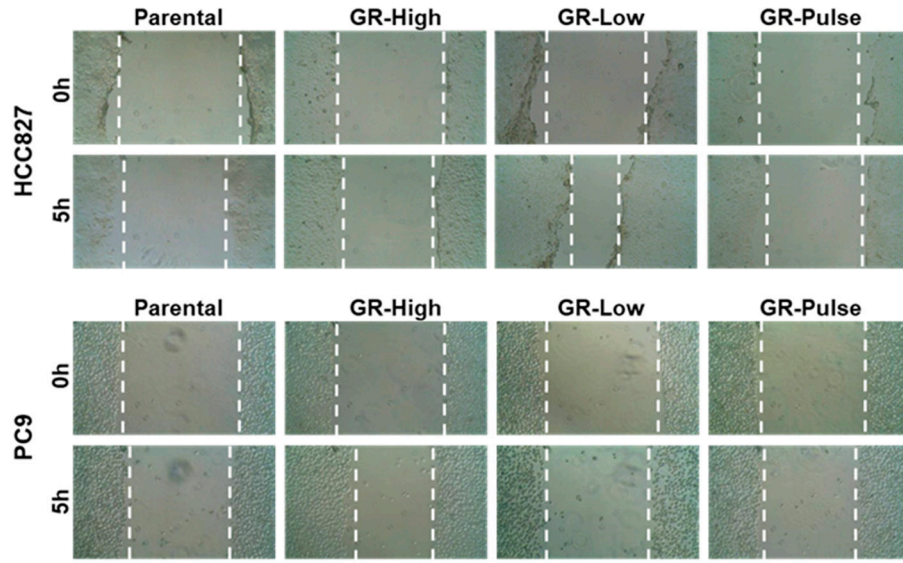

(a)

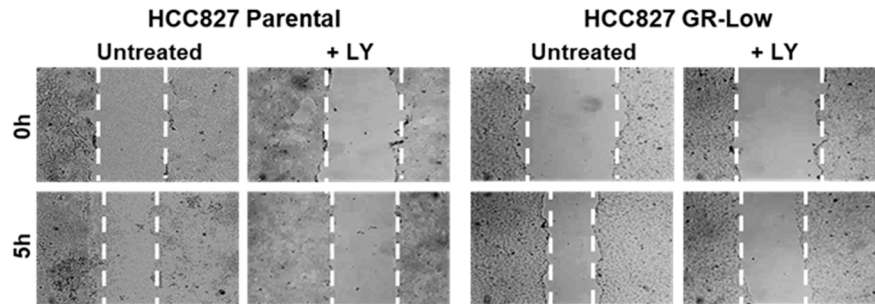

(b)

**Figure S4:** Analysis of migration in GR cells. (a) Representative images of wound healing assay at the indicated time points are shown for parental and GR cells. (b) Representative images of wound healing assay at the indicated time points performed on HCC827 parental and GR-Low cells, untreated and treated with LY2109761 (LY, 5  $\mu$ M).

Raw data Figure 2a

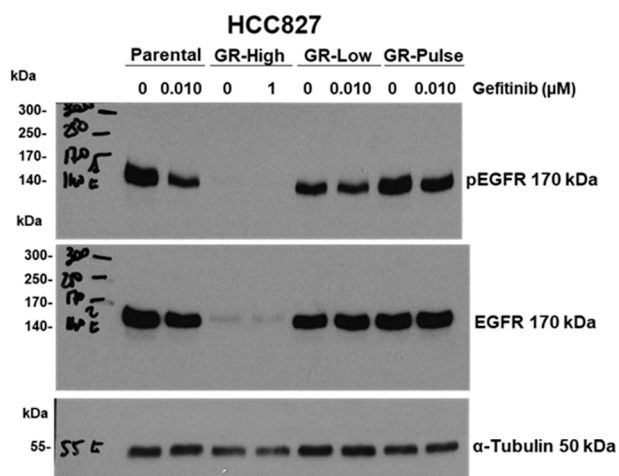

Raw data Figure 2b

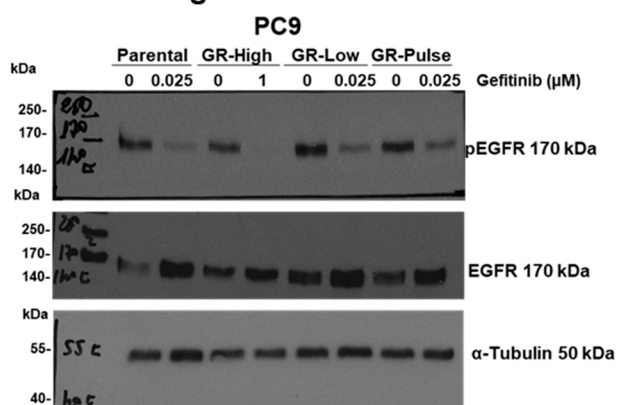

Raw data Figure 2c

**HCC827**

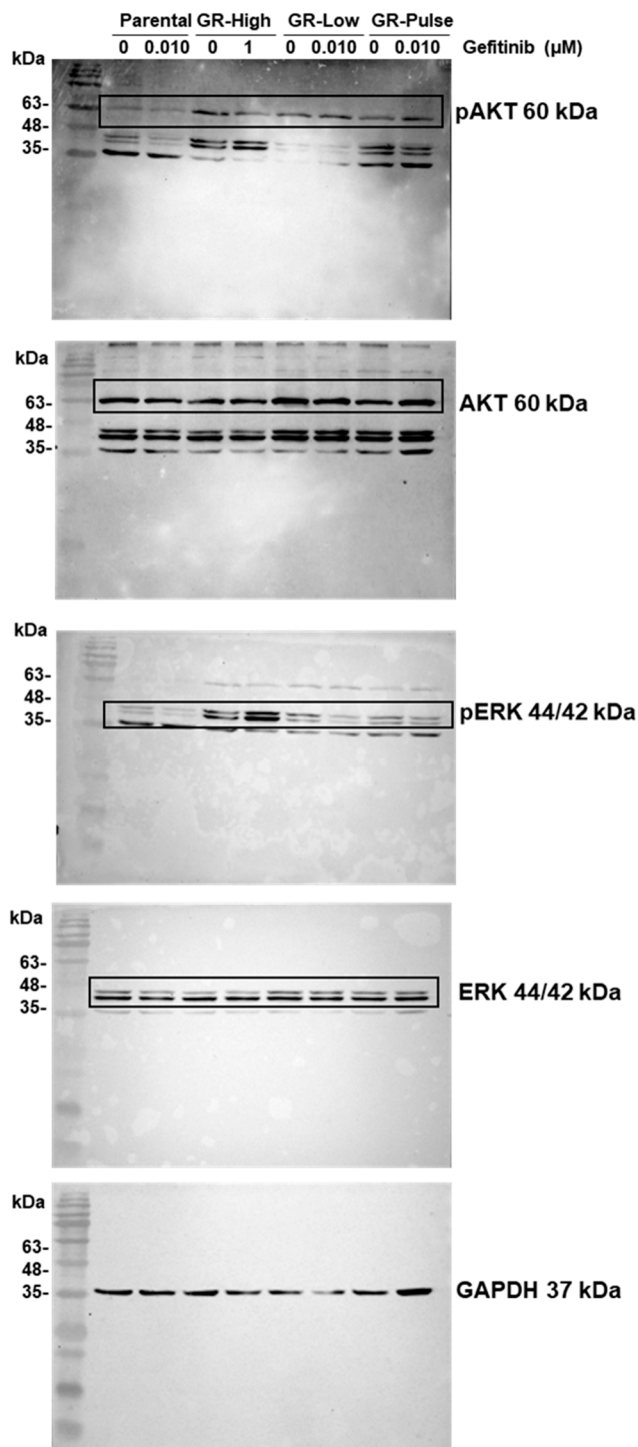

**Figure S5.** Original immunoblot images of figures 2a, b and c. The original scans of the blots are shown. Squares indicate the images used for final figures.

## Raw Data Figure 2d

### PC9

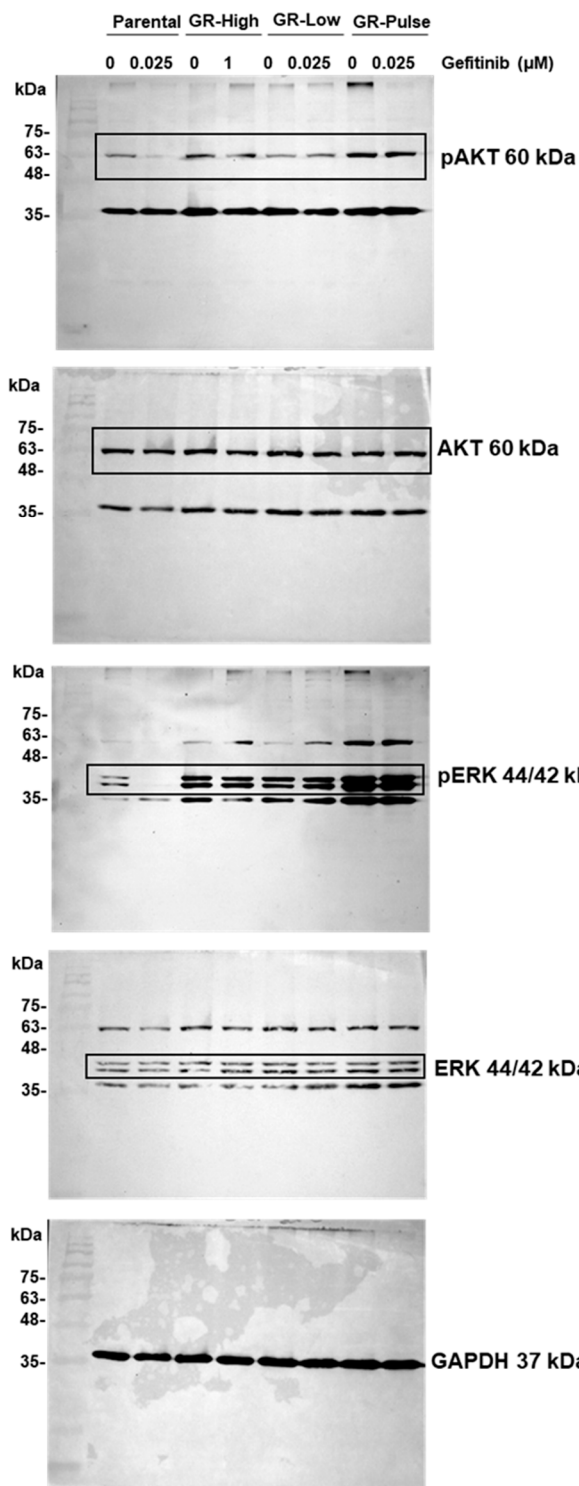

## Raw Data Figure 5a

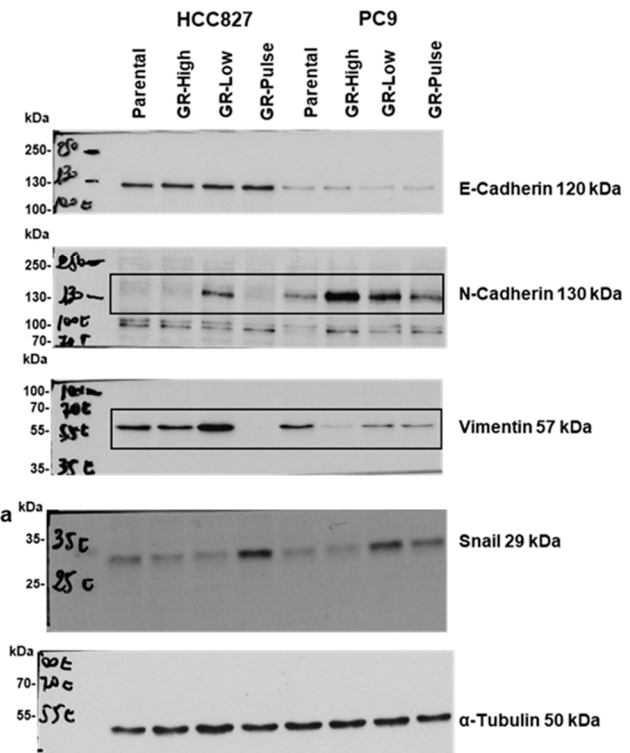

**Figure S6.** Original immunoblot images of figures 2d and 5a. The original scans of the blots are shown. Squares indicate the images used for final figures.



Raw data Figure 6a

TGF- $\beta$ 1 HCC-827 Parental

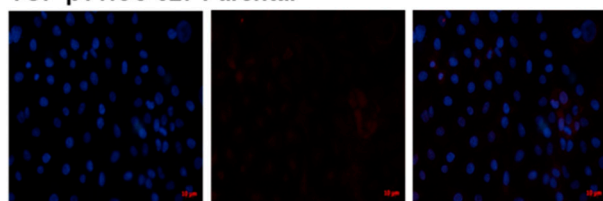

TGF- $\beta$ 1 PC-9 Parental

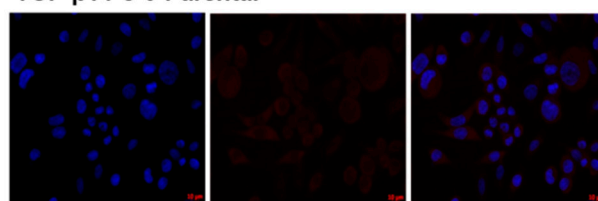

TGF- $\beta$ 1 HCC-827 GR-High

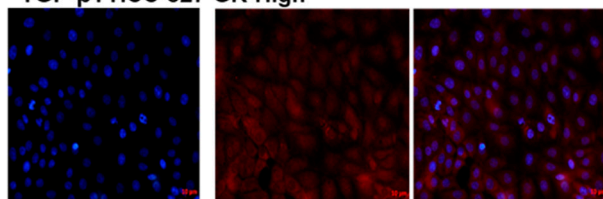

TGF- $\beta$ 1 PC-9 GR-High

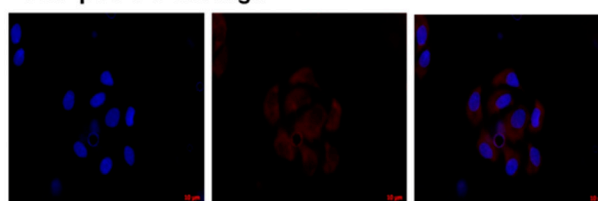

TGF- $\beta$ 1 HCC-827 GR-Low

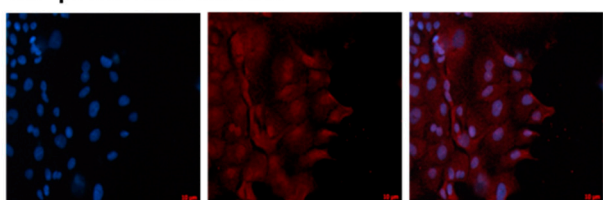

TGF- $\beta$ 1 PC-9 GR-Low

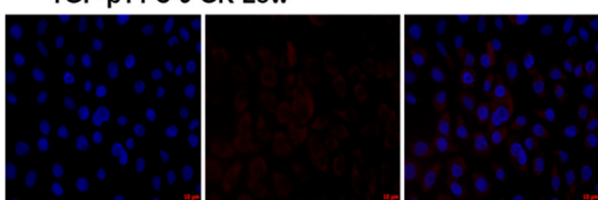

TGF- $\beta$ 1 HCC-827 GR-Pulse

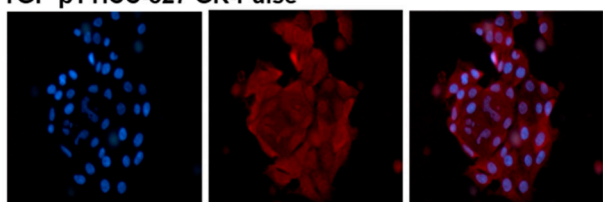

TGF- $\beta$ 1 PC-9 GR-Pulse

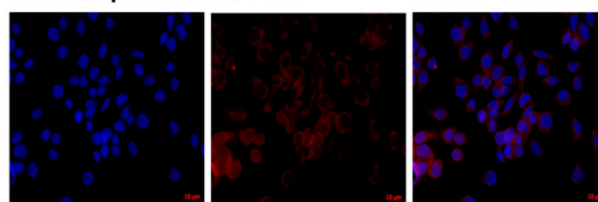

**Figure S7.** Original microscopy images of figure 6a. The original images obtained with fluorescence microscope are shown.
